# Supplementary material for: Child–Adult Transition in Sarcoidosis: A Series of 52 Patients
Source: J Clin Med. 2020 Jul 3;9(7):2097. doi: 10.3390/jcm9072097 (PMC7408766; doi:10.3390/jcm9072097)
Supplement: Supplementary file 1 [file jcm-09-02097-s001.pdf]

## Supplementary Materials for

### Child-adult transition in sarcoidosis: a series of 52 patients

Simon Chauveau <sup>1,2</sup>, Florence Jeny <sup>1,2</sup>, Marie-Emeline Montagne <sup>3</sup>, Rola Abou Taam <sup>4</sup>, Véronique Houdouin <sup>5</sup>, Ulrich Meinzer <sup>6</sup>, Christophe Delacourt <sup>4</sup>, Ralph Epaud <sup>7</sup>, Fleur Cohen <sup>8</sup>, Catherine Chapelon-Abric <sup>9</sup>, Dominique Israël-Biet <sup>10</sup>, Karine Juvin <sup>10</sup>, Antoine Dossier <sup>11</sup>, Bahram Bodaghi <sup>12</sup>, Grégoire Prévot <sup>13</sup>, Jean-Marc Naccache <sup>14</sup>, Sarah Mattioni <sup>15</sup>, Antoine Deschildre <sup>16</sup>, Jacques Brouard <sup>17</sup>, Abdellatif Tazi <sup>18</sup>, Roderich Meckenstock <sup>19</sup>, Morgane Didier <sup>1,2</sup>, Julien Haroche <sup>8</sup>, Annick Clement <sup>3,20</sup>, Jean-François Bernaudin <sup>1,2</sup>, Hilario Nunes <sup>1,2</sup>, Dominique Valeyre <sup>1,2,t</sup>, Nadia Nathan <sup>3,20,\*</sup> and for the French Sarcoidosis Group (GSF) †

**Supplemental Table S1: Comparison between prospective pediatric onset sarcoidosis and retrospective reported pediatric onset sarcoidosis**

| Clinical characteristic                           | Prospective<br>pediatric onset<br>sarcoidosis n = 34 | Retrospective<br>reported pediatric<br>onset sarcoidosis<br>n =18 | p     |
|---------------------------------------------------|------------------------------------------------------|-------------------------------------------------------------------|-------|
| Woman, n (%)                                      | 21 (62%)                                             | 8 (44%)                                                           | ns    |
| Sub-Saharan Africa / Caribbean<br>Ancestry, n (%) | 24 (71%)                                             | 13 (87%)                                                          | ns    |
| Age at diagnosis, median (Q1-Q3)                  | 12 (10-13.75)                                        | 12 (11-14)                                                        | ns    |
| Length of follow up, years, median<br>(Q1-Q3)     | 9.8 (6-13.2)                                         | 17.8 (11.7 -30)                                                   | 0.005 |
| Under treatment at adulthood n (%)                | 14 (41%)                                             | 10 (55%)                                                          | ns    |
| Severity at disease onset, n (%)                  | 9 (26.4%)                                            | 5 (27.7%)                                                         | ns    |
| Severity at end of adult follow up, n<br>(%)      | 5 (14.7%)                                            | 6 (33%)                                                           | ns    |
| Organ involved, median (Q1-Q3)                    | 3 (2-4)                                              | 4 (2.75-4.25)                                                     | ns    |

Q1: First Quartile, Q3: Third quartile. p value estimated by Mann and Whitney test. ns: Non significant  
p>0.05

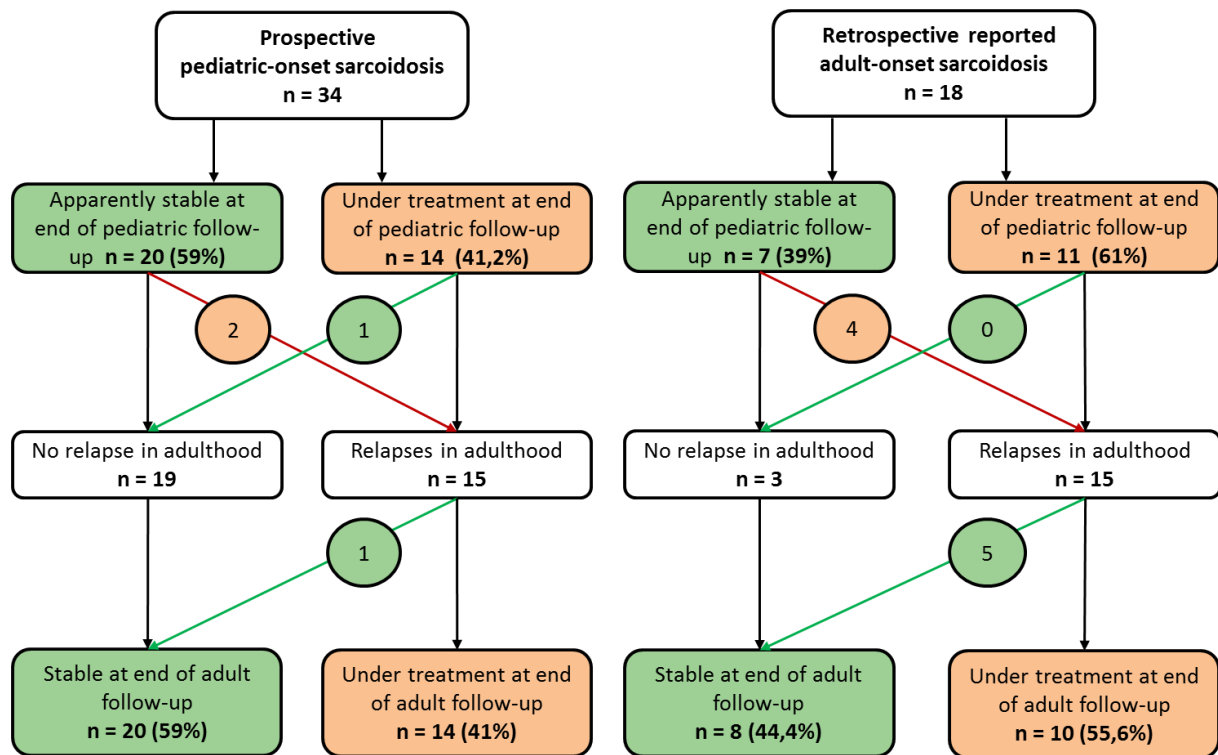

**Supplemental Figure S1: Sarcoidosis evolution from last pediatric evaluation to last adult evaluation in the two subgroups of patients.** Patients whose evolution changed from “stable” to “under treatment” are circled in orange; patients whose evolution changed from “under treatment” to “stable” are circled in green. (Stable was defined as no relapse more than one year after treatment discontinuation).

**Supplemental Table S2: Relapses of sarcoidosis in adulthood**

|                                                                         | <b>Study population<br/>n = 52</b> |
|-------------------------------------------------------------------------|------------------------------------|
| <b>Relapse, patients, n (%) ; relapses, n (%)</b>                       | 36 (69.2%); 110 (100%)             |
| Relapse when reducing doses                                             |                                    |
| Patients, n (%)                                                         | 31 (59%)                           |
| Relapse, n (% of total relapse)                                         | 93 (84.5%)                         |
| Relapse with no treatment for less than 3 years                         |                                    |
| Patients, n (%)                                                         | 9 (17,3%)                          |
| Relapse, n (% of total relapse)                                         | 10 (9,1%)                          |
| Relapse with no treatment for more than 3 years                         |                                    |
| Patients, n (%)                                                         | 5 (9,6%)                           |
| Relapse, n (% of total relapse)                                         | 7 (6,4%)                           |
| Relapse in an initially affected organ                                  |                                    |
| Patients, n (%)                                                         | 34 (65.4%)                         |
| Relapse, n (% of total relapse)                                         | 96 (87.3%) *                       |
| Relapse in a different organ than initially affected: "de novo" relapse |                                    |
| Patients, n (%)                                                         | 6 (11.5%)                          |
| Relapse, n (% of total relapse)                                         | 18 (16.4%) *                       |

\*Some relapses occurred in different organs, which explain that the sum of relapses exceeds 110.

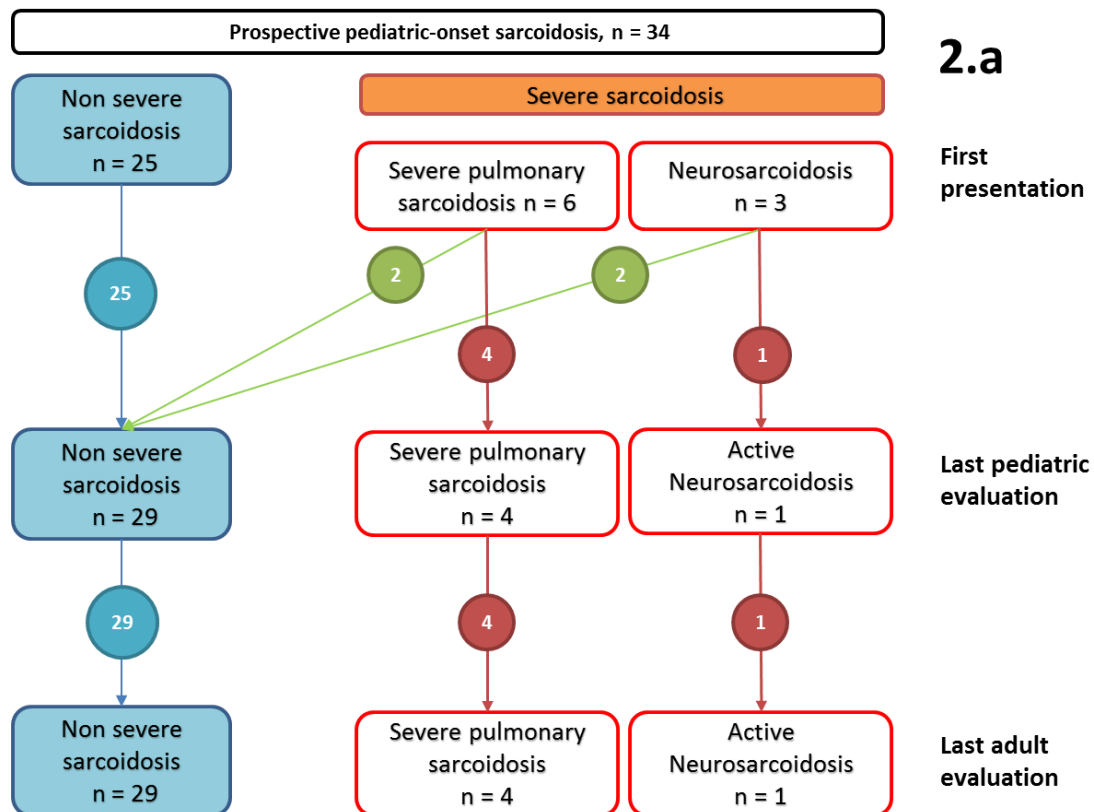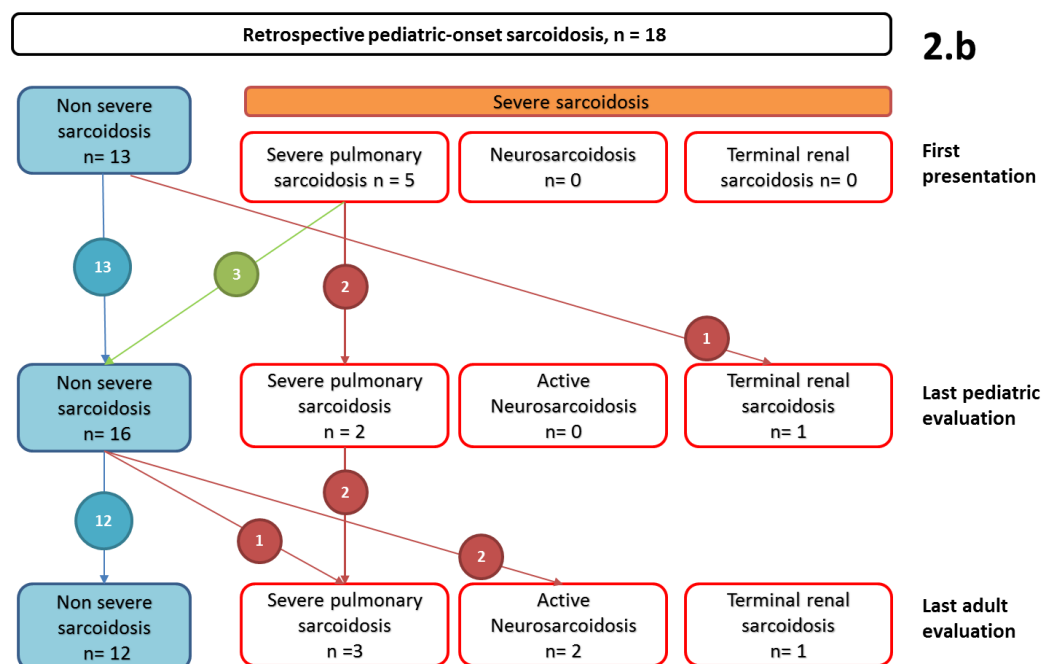

**Supplemental Figure S2: Evolution of severe organ involvements from first pediatric to last adult evaluations. 2a: In prospective included pediatric sarcoidosis onset (n=34). 2b: In retrospectively included pediatric sarcoidosis onset (n=18).** Severe sarcoidosis were defined as lung involvement with Composite Physiologic index (CPI) > 40 and/or a pulmonary hypertension and/or a pulmonary fibrosis extent of more than 20% of lung [14]; (ii) evidence of heart or central nervous system sarcoidosis requiring a treatment; (iii) liver involvement requiring a transplantation; (iv) kidney involvement requiring chronic dialysis or transplantation.

**Supplemental Table S3: Comparison between severe and non-severe sarcoidosis patients**

| Clinical characteristics                                  | Severe<br>sarcoidosis<br>n = 11 | Non-severe<br>sarcoidosis<br>n = 41 | HR<br>(95% CI)  | p  |
|-----------------------------------------------------------|---------------------------------|-------------------------------------|-----------------|----|
| Age at diagnosis, median (Q1;Q3)                          | 12 (11;15)                      | 12(9.5;14)                          | 1.12 (0.9-1.4)  | ns |
| Woman, n (%)                                              | 4 (43.4%)                       | 25 (61%)                            | 2.01 (0.6-7.1)  | ns |
| Sub-Saharan Africa or Caribbean ancestry, n (%)           | 8 (72.7%)                       | 29 (70.7%)                          | 0.78 (0.2-3.9)  | ns |
| <b>Scadding's chest radiography classification, n (%)</b> |                                 |                                     | 1.4 (0.8-2.3)   | ns |
| 0                                                         | 2 (18.2%)                       | 19 (46.4%)                          |                 |    |
| 1                                                         | 1 (9.1%)                        | 4 (9.7%)                            |                 |    |
| 2                                                         | 5 (45.5%)                       | 6 (22%)                             |                 |    |
| 3                                                         | 3 (27.3%)                       | 12 (29.3%)                          |                 |    |
| <b>Pulmonary function tests</b>                           |                                 |                                     |                 |    |
| FVC % at first evaluation, median (Q1;Q3)                 | 45 (33;80)                      | 68 (58;84)                          | 0.98 (0.9-1.01) | ns |
| FEV1 % at first evaluation, median (Q1;Q3)                | 50 (29;81)                      | 80 (59;91)                          | 0.86 (0.22-3.4) | ns |
| DLCO % at first evaluation, median (Q1;Q3)                | 75 (60;91)                      | 63 (46;84)                          | 1.1 (0.9-1.2)   | ns |
| Composite Physiologic Index <sup>1</sup>                  | 33 (16;44)                      | 37 (24;53)                          | 0.98 (0.9-1.1)  | ns |
| Organ Involved at diagnosis : median (Q1;Q3)              | 4 (2.5;4)                       | 3 (2;4)                             | 0.93 (0.58-1.5) | ns |
| <b>Organ involvement at diagnosis, n (%)</b>              |                                 |                                     |                 |    |
| Lung                                                      | 11 (100%)                       | 34 (83%)                            | 0.95 (0.3-2.9)  | ns |
| Eye                                                       | 7 (64%)                         | 17 (41%)                            | 2.4 (0.7-8.3)   | ns |
| Kidney                                                    | 2 (18%)                         | 5 (12%)                             | 2.0 (0.42-9.6)  | ns |
| Hepatic                                                   | 7 (64%)                         | 19 (46%)                            | 1.2 (0.3-4.3)   | ns |
| Peripheral lymph node                                     | 3 (27%)                         | 17 (41%)                            | 0.6 (1.6-2.8)   | ns |
| Skin                                                      | 3 (27%)                         | 6 (14%)                             | 2.3 (0.6-8.8)   | ns |
| Spleen                                                    | 1 (9%)                          | 6 (15%)                             | 0.4 (0.05-3.3)  | ns |
| Central neurologic                                        | 1 (9%)                          | 2 (5%)                              | 2.2 (0.27-17.9) | ns |
| Joints                                                    | 1 (9%)                          | 7 (17%)                             | 0.44 (0.55-3.5) | ns |
| Fatigue                                                   | 3 (27%)                         | 18 (44%)                            | 0.78 (0.19-3.1) | ns |
| Fever                                                     | 1 (9%)                          | 16 (39%)                            | 0.21(0.03-1.7)  | ns |
| Weight loss                                               | 3 (27%)                         | 19 (46%)                            | 0.78 (0.19-3.3) | ns |

Q1: First Quartile, Q3: Third quartile. p value estimated by cox regression model. ns: Non significant p>0.05. FVC: Forced Vital capacity, FEV1: Forced expiratory volume in one second. DLCO: Diffusion Capacity for CO. <sup>1</sup>Composite Physiologic Index such as described by Walsh et al, *Lancet Respiratory Medicine*. Severe sarcoidosis was defined such as: (i) lung involvement with Composite Physiologic index (CPI) > 40 and/or pulmonary hypertension and/or pulmonary fibrosis extent at CT of more than 20% of the lung [14]; (ii) evidence of heart or central nervous system sarcoidosis requiring a treatment; (iii) liver involvement requiring a transplantation; (iv) kidney involvement requiring chronic dialysis or transplantation.

**Supplemental Table S4: Comparison between stable and under treatment sarcoidosis patients**

Q1: First Quartile, Q3: Third quartile. p value estimated by cox regression model. ns: Non significant p>0.05. FVC:

| Clinical characteristics                                  | Stable<br>sarcoidosis<br>n = 28 | Under treatment<br>sarcoidosis<br>n = 24 | HR<br>(95% CI)   | p  |
|-----------------------------------------------------------|---------------------------------|------------------------------------------|------------------|----|
| Age at diagnosis, median (Q1;Q3)                          | 12.7                            | 12.8                                     | 1.13 (0.97-1.3)  | ns |
| Woman, n (%)                                              | 15 (55.6%)                      | 14 (56%)                                 | 0.49 (0.21-1.1)  | ns |
| Sub-Saharan Africa or Caribbean ancestry, n (%)           | 19 (70.4%)                      | 18 (72%)                                 | 0.76 (0.3-1.9)   | ns |
| <b>Scadding's chest radiography classification, n (%)</b> |                                 |                                          | 1.1 (0.7-1.6)    | ns |
| 0                                                         | 11 (39%)                        | 10 (42%)                                 |                  |    |
| 1                                                         | 3 (11%)                         | 2 (8.3%)                                 |                  |    |
| 2                                                         | 5 (18%)                         | 5 (21%)                                  |                  |    |
| 3                                                         | 9 (32%)                         | 6 (25%)                                  |                  |    |
| <b>Pulmonary function tests</b>                           |                                 |                                          |                  |    |
| FVC % at first evaluation, median (Q1;Q3)                 | 69 (53;85)                      | 68 (66;80)                               | 1.01 (0.99-1.)   | ns |
| FEV1 % at first evaluation, median (Q1;Q3)                | 80 (59;89)                      | 80 (49;88)                               | 1.0 (0.98-1.02)  | ns |
| DLCO % at first evaluation, median (Q1;Q3)                | 63 (42;84)                      | 66 (59;86)                               | 1.01 (0.9-1.1)   | ns |
| Composite Physiologic Index                               | 36.5 (24;54)                    | 38 (15;44)                               | 0.98 (0.96-1.01) | ns |
| Organ Involved at diagnosis: median (Q1;Q3)               | 3 (2;4)                         | 3.5 (2.75;4)                             | 0.8 (0.5-1.2)    | ns |
| <b>Organ involvement at diagnosis, n (%)</b>              |                                 |                                          |                  |    |
| Lung                                                      | 24 (58.5%)                      | 21 (87.5%)                               | 0.44 (0.1-1.5)   | ns |
| Eye                                                       | 12 (43%)                        | 12 (50%)                                 | 0.97 (0.4-2.2)   | ns |
| Kidney                                                    | 5 (18%)                         | 2 (8%)                                   | 0.77 (0.2-3.3)   | ns |
| Peripheral lymph node                                     | 10 (36%)                        | 10 (42%)                                 | 1.42 (0.6-3.3)   | ns |
| Skin                                                      | 6 (21%)                         | 3 (12.5%)                                | 0.24 (0.6-1.1)   | ns |
| Spleen                                                    | 1 (4%)                          | 6 (25%)                                  | 1.6 (0.6-4.3)    | ns |
| Central neurologic                                        | 0 (0%)                          | 3 (0.125%)                               | 1.64 (0.5-5.9)   | ns |
| Joints                                                    | 6 (21%)                         | 2 (8.3%)                                 | 0.54 (0.1-2.3)   | ns |
| Fatigue                                                   | 12 (43%)                        | 9 (37.5%)                                | 1.4 (0.6-3.3)    | ns |
| Fever                                                     | 11 (39%)                        | 6 (25%)                                  | 0.6 (0.2-1.8)    | ns |
| Weight                                                    | 14 (50%)                        | 8 (33%)                                  | 0.98 (0.9-1.01)  | ns |

Forced Vital capacity, FEV1: Forced expiratory volume in one second. DLCO: Diffusion Capacity for CO.

<sup>1</sup>Composite Physiologic Index such as described by Walsh et al, *Lancet Respiratory Medicine*. Stable sarcoidosis was defined as no relapse in more than one year after treatment discontinuation.
